# Supplementary material for: In vitro toxicity screening of amorphous silica nanoparticles using mitochondrial fraction exposure followed by MS-based proteomic analysis
Source: Royal Society of Chemistry journal article supplement (doi:10.1039/d2an00569g), 2022-01-01
Supplement: d2an00569g1.pdf [file d2an00569g1.pdf]

Supplementary Table1: Mitochondrial protein changes after SiNP exposure, protein IDs, subcellular localization and protein responses expressed as an increase or decrease in fold changes (normalized to controls)

| Protein Name                                                                                                                                                                                                                                 | Accession #                                    | Gene Symbol                                        | Subcellular Location                                                                                                | 5 Tio2 | 15 Tio2 | 5 SiNP12 | 15 SiNP12 | 5 C3 15 | 15 C3 15 | 5 C11 15 | 15 C11 15 | 5 NH2 15 | 15 NH2 15 | 5 PEG 15 | 15 PEG 15 | 5 P15 | 15 P15 | 5 P30 | 15 P30 | 5 P75 | 15 P75 |
|----------------------------------------------------------------------------------------------------------------------------------------------------------------------------------------------------------------------------------------------|------------------------------------------------|----------------------------------------------------|---------------------------------------------------------------------------------------------------------------------|--------|---------|----------|-----------|---------|----------|----------|-----------|----------|-----------|----------|-----------|-------|--------|-------|--------|-------|--------|
| Probable Xaa-Pro aminopeptidase 3                                                                                                                                                                                                            | B7ZMP1                                         | Xpnpep3                                            | Mitochondrion; Cytoplasm                                                                                            | -      | -       | ↑        | ↑         | ↑       | -        | -        | -         | ↑        | -         | -        | -         | -     | -      | -     | -      | -     | -      |
| Glutaminase kidney isoform, mitochondrial                                                                                                                                                                                                    | D3Z7P3                                         | Gls                                                | Isoform 2: Mitochondrion                                                                                            | ↓      | ↓       | ↓        | ↓         | ↑       | ↓        | ↓        | ↓         | ↓        | ↓         | ↓        | ↓         | ↓     | ↓      | ↓     | ↓      | ↓     | ↓      |
| Dihydropolyl dehydrogenase, mitochondrial                                                                                                                                                                                                    | O08749                                         | Dld                                                | Mitochondrion matrix; Nucleus; Cell projection->cilium->flagellum; Cytoplasmic vesicle->secretory vesicle->acrosome | ↓      | ↓       | ↓        | ↓         | ↑       | ↓        | ↓        | ↓         | ↓        | ↓         | ↓        | ↓         | ↑     | ↓      | ↓     | ↓      | ↓     | ↓      |
| 3-hydroxyacyl-CoA dehydrogenase type-2                                                                                                                                                                                                       | O08756                                         | Hsd17b10                                           | Mitochondrion                                                                                                       | ↓      | ↓       | ↑        | ↓         | ↑       | ↓        | ↓        | ↓         | ↓        | ↓         | ↓        | ↓         | ↑     | ↓      | ↓     | ↓      | ↓     | ↓      |
| Prohibitin-2                                                                                                                                                                                                                                 | O35129                                         | Phb2                                               | Mitochondrion inner membrane; Cytoplasm; Nucleus                                                                    | ↓      | ↓       | ↓        | ↓         | ↓       | ↓        | ↓        | ↓         | ↓        | ↓         | ↓        | ↓         | ↓     | ↓      | ↓     | ↓      | ↓     | ↓      |
| ATPase inhibitor, mitochondrial                                                                                                                                                                                                              | O35143                                         | Atpif1                                             | Mitochondrion                                                                                                       | ↓      | ↓       | ↑        | ↓         | ↑       | ↓        | ↑        | ↓         | ↓        | ↓         | ↓        | ↓         | ↑     | ↓      | ↓     | ↓      | ↓     | ↓      |
| Complement component 1 Q subcomponent-binding protein, mitochondrial                                                                                                                                                                         | O35658                                         | C1qbp                                              | Mitochondrion matrix; Nucleus; Cell membrane; Secreted; Cytoplasm; Nucleus->nucleolus                               | ↑      | -       | ↑        | -         | ↑       | -        | ↑        | -         | -        | -         | ↑        | -         | ↑     | -      | ↑     | -      | -     | -      |
| Branched-chain-amino-acid aminotransferase, mitochondrial                                                                                                                                                                                    | O35855                                         | Bcat2                                              | Mitochondrion                                                                                                       | ↓      | ↓       | ↑        | ↓         | ↓       | ↓        | ↓        | ↓         | ↓        | ↓         | ↓        | ↓         | ↓     | ↓      | ↓     | ↓      | ↓     | ↓      |
| Mitochondrial import inner membrane translocase subunit TIM44                                                                                                                                                                                | O35857                                         | Timm44                                             | Mitochondrion inner membrane                                                                                        | ↓      | ↓       | ↓        | ↓         | ↑       | ↓        | ↓        | ↓         | ↓        | ↓         | ↓        | ↓         | ↑     | ↓      | ↓     | ↓      | ↓     | ↓      |
| Fra1x, mitochondrial;Fra1x intermediate form;Fra1x mature form                                                                                                                                                                               | O35943                                         | Fxn                                                | Cytoplasm->cytosol; Mitochondrion                                                                                   | ↓      | ↓       | ↑        | ↓         | ↑       | ↓        | ↓        | ↓         | ↓        | ↓         | ↓        | ↓         | ↓     | ↓      | ↑     | ↓      | ↓     | ↑      |
| Aldehyde dehydrogenase, cytosolic 1    "Aldehyde dehydrogenase, mitochondrial"    Aldehyde dehydrogenase family 1 member A3    Retinal dehydrogenase 2    Retinal dehydrogenase 1 {ECO:0000305}    "Aldehyde dehydrogenase X, mitochondrial" | O35945; P47738; Q9JHW9; Q62148; P24549; Q9CZS1 | Aldh1a7; Aldh2; Aldh1a3; Aldh1a2; Aldh1a1; Aldh1b1 | Cytoplasm    Mitochondrion matrix    Cytoplasm    Cytoplasm    Cytoplasm->cytosol    Mitochondrion matrix           | ↓      | ↓       | ↓        | ↓         | ↓       | ↓        | ↓        | ↓         | ↓        | ↓         | ↓        | ↓         | ↓     | ↓      | ↓     | ↓      | ↓     | ↓      |
| 39S ribosomal protein L23, mitochondrial                                                                                                                                                                                                     | O35972                                         | Mrpl23                                             | Mitochondrion                                                                                                       | ↓      | ↓       | ↑        | ↓         | ↑       | ↓        | ↓        | ↓         | ↓        | ↓         | ↓        | ↓         | ↓     | ↓      | ↓     | ↓      | ↓     | ↓      |
| ATP-dependent Clp protease proteolytic subunit, mitochondrial                                                                                                                                                                                | O88696                                         | Clpp                                               | Mitochondrion matrix                                                                                                | ↓      | ↓       | ↓        | ↓         | ↑       | ↓        | ↓        | ↓         | ↓        | ↓         | ↓        | ↓         | ↑     | ↓      | ↓     | ↓      | ↓     | ↓      |
| Isocitrate dehydrogenase [NADP] cytoplasmic    "Isocitrate dehydrogenase [NADP], mitochondrial"                                                                                                                                              | O88844; P54071                                 | Idh1; Idh2                                         | Cytoplasm    Mitochondrion                                                                                          | ↓      | ↓       | ↓        | ↑         | ↓       | ↓        | ↓        | ↓         | ↓        | ↓         | ↓        | ↓         | ↑     | ↓      | ↓     | ↓      | ↓     | ↓      |
| 2-amino-3-ketobutyrate coenzyme A ligase, mitochondrial                                                                                                                                                                                      | O88986                                         | Gcat                                               | Mitochondrion; Nucleus                                                                                              | ↓      | ↓       | ↑        | ↓         | ↑       | ↓        | ↓        | ↓         | ↓        | ↓         | ↓        | ↓         | ↑     | ↓      | ↓     | ↓      | ↓     | ↓      |
| Dihydrofolate reductase                                                                                                                                                                                                                      | P00375                                         | Dhfr                                               | Mitochondrion; Cytoplasm                                                                                            | ↑      | ↑       | ↑        | ↓         | ↑       | ↓        | ↓        | ↑         | ↑        | ↑         | ↑        | ↑         | ↑     | ↓      | ↑     | ↓      | ↓     | ↑      |
| Aspartate aminotransferase, mitochondrial                                                                                                                                                                                                    | P05202                                         | Got2                                               | Mitochondrion matrix; Cell membrane                                                                                 | ↓      | ↓       | ↓        | ↓         | ↑       | ↓        | ↓        | ↓         | ↓        | ↓         | ↓        | ↓         | ↑     | ↓      | ↓     | ↓      | ↓     | ↓      |

|                                                                                                                                                                                                                                                                                                                                                                                                                                                                                                 |                                                                                                                |                                                                                 |                                                                                                                                                                                                                                                                                                                                                                                                                                                                                                                                                                                                                                                                                                                                                                                                                                                                                                                                                                                                                                                                                                                                                                                                                                                                                                                         |   |   |   |   |   |   |   |   |   |   |   |   |   |   |   |   |   |   |
|-------------------------------------------------------------------------------------------------------------------------------------------------------------------------------------------------------------------------------------------------------------------------------------------------------------------------------------------------------------------------------------------------------------------------------------------------------------------------------------------------|----------------------------------------------------------------------------------------------------------------|---------------------------------------------------------------------------------|-------------------------------------------------------------------------------------------------------------------------------------------------------------------------------------------------------------------------------------------------------------------------------------------------------------------------------------------------------------------------------------------------------------------------------------------------------------------------------------------------------------------------------------------------------------------------------------------------------------------------------------------------------------------------------------------------------------------------------------------------------------------------------------------------------------------------------------------------------------------------------------------------------------------------------------------------------------------------------------------------------------------------------------------------------------------------------------------------------------------------------------------------------------------------------------------------------------------------------------------------------------------------------------------------------------------------|---|---|---|---|---|---|---|---|---|---|---|---|---|---|---|---|---|---|
| Proto-oncogene tyrosine-protein kinase LCK   Tyrosine-protein kinase Lyn   Fibroblast growth factor receptor 2   Tyrosine-protein kinase Blk   Serine/threonine-protein kinase MAK   Tyrosine-protein kinase HCK   Tyrosine-protein kinase Yes   Serine/threonine-protein kinase ICK   Tyrosine-protein kinase Fgr   Fibroblast growth factor receptor 1   Fibroblast growth factor receptor 3   Tyrosine-protein kinase Fyn   Fibroblast growth factor receptor 4   Cyclin-dependent kinase 20 | P06240; P25911; P21803; P16277; Q04859; P08103; Q04736; Q9JKV2; P14234; P16092; Q61851; P39688; Q03142; Q9JHU3 | Lck; Lyn; Fgfr2; Blk; Mak; Hck; Yes1; Ick; Fgr; Fgfr1; Fgfr3; Fyn; Fgfr4; Cdk20 | Cytoplasm; Cell membrane   Cell membrane; Nucleus; Cytoplasm; Cytoplasm->perinuclear region; Golgi apparatus; Membrane   Cell membrane->Single-pass type I membrane protein; Golgi apparatus; Cytoplasmic vesicle   Cell membrane   Nucleus; Cytoplasm->cytoskeleton->microtubule organizing center->centrosome; Cytoplasm->cytoskeleton->spindle; Midbody; Cell projection->cilium->photoreceptor outer segment; Photoreceptor inner segment   Isoform 2: Cell membrane Lipid-anchor; Membrane->caveola; Cell junction->focal adhesion; Cytoplasm->cytoskeleton; Golgi apparatus; Cytoplasmic vesicle; Lysosome; Nucleus   Cell membrane; Cytoplasm->cytoskeleton->microtubule organizing center->centrosome; Cytoplasm->cytosol   Cytoplasm->cytosol; Cell projection->cilium; Nucleus; Cytoplasm->cytoskeleton->cilium basal body   Cell membrane; Cell membrane; Cell projection->ruffle membrane; Cytoplasm->cytosol; Cytoplasm->cytoskeleton; Mitochondrion inner membrane; Mitochondrion intermembrane space   Isoform 5: Cell membrane->Single-pass type I membrane protein   Cell membrane->Single-pass type I membrane protein; Cytoplasmic vesicle; Endoplasmic reticulum   Cytoplasm; Nucleus; Cell membrane   Cell membrane; Endosome; Endoplasmic reticulum   Nucleus; Cytoplasm; Cell projection->cilium | - | - | ↑ | - | ↑ | - | ↑ | - | - | - | - | - | ↑ | - | - | - | - | - |
| Malate dehydrogenase, mitochondrial                                                                                                                                                                                                                                                                                                                                                                                                                                                             | P08249                                                                                                         | Mdh2                                                                            | Mitochondrion matrix                                                                                                                                                                                                                                                                                                                                                                                                                                                                                                                                                                                                                                                                                                                                                                                                                                                                                                                                                                                                                                                                                                                                                                                                                                                                                                    | ↓ | ↓ | ↑ | ↓ | ↑ | ↓ | ↓ | ↓ | ↓ | ↓ | ↓ | ↓ | ↑ | ↓ | ↓ | ↓ | ↓ | ↓ |
| Superoxide dismutase [Mn], mitochondrial                                                                                                                                                                                                                                                                                                                                                                                                                                                        | P09671                                                                                                         | Sod2                                                                            | Mitochondrion matrix                                                                                                                                                                                                                                                                                                                                                                                                                                                                                                                                                                                                                                                                                                                                                                                                                                                                                                                                                                                                                                                                                                                                                                                                                                                                                                    | ↓ | ↓ | ↓ | ↓ | ↑ | ↓ | ↓ | ↓ | ↓ | ↓ | ↓ | ↓ | ↑ | ↓ | ↓ | ↓ | ↓ | ↓ |
| Cytochrome c oxidase subunit 5A, mitochondrial                                                                                                                                                                                                                                                                                                                                                                                                                                                  | P12787                                                                                                         | Cox5a                                                                           | Mitochondrion inner membrane                                                                                                                                                                                                                                                                                                                                                                                                                                                                                                                                                                                                                                                                                                                                                                                                                                                                                                                                                                                                                                                                                                                                                                                                                                                                                            | ↓ | ↓ | ↑ | ↓ | ↑ | ↓ | ↓ | ↓ | ↓ | ↓ | ↓ | ↓ | ↑ | ↓ | ↓ | ↓ | ↓ | ↓ |
| Methylmalonyl-CoA mutase, mitochondrial                                                                                                                                                                                                                                                                                                                                                                                                                                                         | P16332                                                                                                         | Mut                                                                             | Mitochondrion matrix                                                                                                                                                                                                                                                                                                                                                                                                                                                                                                                                                                                                                                                                                                                                                                                                                                                                                                                                                                                                                                                                                                                                                                                                                                                                                                    | ↓ | ↓ | ↑ | ↓ | ↑ | ↓ | ↓ | ↓ | ↓ | ↓ | ↓ | ↓ | ↑ | ↓ | ↓ | ↓ | ↓ | ↓ |
| Bifunctional methylenetetrahydrofolate dehydrogenase/cyclohydrolase, mitochondrial; NAD-dependent methylenetetrahydrofolate dehydrogenase; Methylenetetrahydrofolate cyclohydrolase                                                                                                                                                                                                                                                                                                             | P18155                                                                                                         | Mthfd2                                                                          | Mitochondrion                                                                                                                                                                                                                                                                                                                                                                                                                                                                                                                                                                                                                                                                                                                                                                                                                                                                                                                                                                                                                                                                                                                                                                                                                                                                                                           | ↓ | ↓ | ↑ | ↑ | ↑ | ↓ | ↑ | ↓ | ↓ | ↓ | ↓ | ↑ | ↓ | ↑ | ↓ | ↓ | ↓ | ↓ |
| Cytochrome c oxidase subunit 5B, mitochondrial                                                                                                                                                                                                                                                                                                                                                                                                                                                  | P19536                                                                                                         | Cox5b                                                                           | Mitochondrion inner membrane                                                                                                                                                                                                                                                                                                                                                                                                                                                                                                                                                                                                                                                                                                                                                                                                                                                                                                                                                                                                                                                                                                                                                                                                                                                                                            | ↓ | ↓ | ↑ | ↓ | ↑ | ↓ | ↓ | ↓ | ↓ | ↓ | ↓ | ↓ | ↑ | ↓ | ↓ | ↓ | ↓ | ↓ |
| Thioredoxin-dependent peroxide reductase, mitochondrial                                                                                                                                                                                                                                                                                                                                                                                                                                         | P20108                                                                                                         | Prdx3                                                                           | Mitochondrion; Cytoplasm; Early endosome                                                                                                                                                                                                                                                                                                                                                                                                                                                                                                                                                                                                                                                                                                                                                                                                                                                                                                                                                                                                                                                                                                                                                                                                                                                                                | ↓ | ↓ | ↑ | ↓ | ↓ | ↓ | ↑ | ↓ | ↓ | ↓ | ↓ | ↓ | ↑ | ↓ | ↓ | ↓ | ↓ | ↓ |
| Glutamate dehydrogenase 1, mitochondrial                                                                                                                                                                                                                                                                                                                                                                                                                                                        | P26443                                                                                                         | Glud1                                                                           | Mitochondrion matrix                                                                                                                                                                                                                                                                                                                                                                                                                                                                                                                                                                                                                                                                                                                                                                                                                                                                                                                                                                                                                                                                                                                                                                                                                                                                                                    | ↓ | ↓ | ↑ | ↓ | ↑ | ↓ | ↓ | ↓ | ↓ | ↓ | ↓ | ↓ | ↑ | ↓ | ↓ | ↓ | ↓ | ↓ |
| Ornithine aminotransferase, mitochondrial                                                                                                                                                                                                                                                                                                                                                                                                                                                       | P29758                                                                                                         | Oat                                                                             | Mitochondrion matrix                                                                                                                                                                                                                                                                                                                                                                                                                                                                                                                                                                                                                                                                                                                                                                                                                                                                                                                                                                                                                                                                                                                                                                                                                                                                                                    | ↑ | ↓ | ↑ | ↓ | ↑ | ↓ | ↑ | ↓ | ↓ | ↓ | ↓ | ↑ | ↓ | ↑ | ↓ | ↓ | ↓ | ↑ |
| Pyruvate dehydrogenase E1 component subunit alpha, somatic form, mitochondrial                                                                                                                                                                                                                                                                                                                                                                                                                  | P35486                                                                                                         | Pdha1                                                                           | Mitochondrion matrix                                                                                                                                                                                                                                                                                                                                                                                                                                                                                                                                                                                                                                                                                                                                                                                                                                                                                                                                                                                                                                                                                                                                                                                                                                                                                                    | ↓ | ↓ | ↑ | ↓ | ↑ | ↓ | ↓ | ↓ | ↓ | ↓ | ↓ | ↓ | ↑ | ↓ | ↓ | ↓ | ↓ | ↓ |

|                                                                                                            |        |         |                                                                                                        |   |   |   |   |   |   |   |   |   |   |   |   |   |   |   |   |   |   |
|------------------------------------------------------------------------------------------------------------|--------|---------|--------------------------------------------------------------------------------------------------------|---|---|---|---|---|---|---|---|---|---|---|---|---|---|---|---|---|---|
| Hydroxymethylglutaryl-CoA lyase, mitochondrial                                                             | P38060 | Hmgcl   | Mitochondrion matrix; Peroxisome                                                                       | ↓ | ↑ | ↑ | ↑ | ↑ | ↓ | ↓ | ↓ | ↓ | ↓ | ↑ | ↓ | ↑ | ↓ | ↓ | ↓ | ↓ | ↓ |
| Stress-70 protein, mitochondrial                                                                           | P38647 | Hspa9   | Mitochondrion; Nucleus->nucleolus                                                                      | ↓ | ↓ | ↑ | ↓ | ↑ | ↓ | ↑ | ↓ | ↓ | ↓ | ↑ | ↓ | ↑ | ↓ | ↓ | ↓ | ↓ | ↓ |
| Enoyl-CoA delta isomerase 1, mitochondrial                                                                 | P42125 | Eci1    | Mitochondrion matrix                                                                                   | ↓ | ↑ | ↑ | ↑ | ↑ | ↓ | ↓ | ↓ | ↓ | ↓ | ↓ | ↓ | ↓ | ↓ | ↓ | ↓ | ↓ | ↓ |
| Medium-chain specific acyl-CoA dehydrogenase, mitochondrial                                                | P45952 | Acadm   | Mitochondrion matrix                                                                                   | ↓ | ↓ | ↑ | ↓ | ↑ | ↓ | ↓ | ↓ | ↓ | ↓ | ↓ | ↓ | ↑ | ↓ | ↓ | ↓ | ↓ | ↓ |
| Adrenodoxin, mitochondrial                                                                                 | P46656 | Fdx1    | Mitochondrion matrix                                                                                   | - | ↑ | ↑ | ↑ | ↑ | - | - | - | ↑ | - | ↑ | - | ↑ | - | ↑ | - | - | - |
| Aldehyde dehydrogenase, mitochondrial                                                                      | P47738 | Aldh2   | Mitochondrion matrix                                                                                   | ↓ | ↓ | ↑ | ↓ | ↑ | ↓ | ↓ | ↓ | ↓ | ↓ | ↓ | ↓ | ↑ | ↓ | ↓ | ↓ | ↓ | ↓ |
| Cytochrome c oxidase subunit 7A2, mitochondrial                                                            | P48771 | Cox7a2  | Mitochondrion inner membrane                                                                           | - | ↑ | - | - | - | - | - | - | - | - | ↑ | - | - | - | ↑ | - | - | - |
| ADP/ATP translocase 1                                                                                      | P48962 | Slc25a4 | Mitochondrion inner membrane->Multi-pass membrane protein                                              | - | - | - | - | - | - | - | - | - | - | - | - | ↑ | - | - | - | - | - |
| Hematopoietic lineage cell-specific protein                                                                | P49710 | Hcls1   | Mitochondrion                                                                                          | ↑ | ↑ | ↑ | - | - | ↑ | ↑ | - | - | - | ↑ | - | ↑ | - | ↑ | - | - | - |
| 2-oxoisovalerate dehydrogenase subunit alpha, mitochondrial                                                | P50136 | Bckdha  | Mitochondrion matrix                                                                                   | - | - | - | - | ↑ | - | - | - | - | - | - | - | ↑ | - | - | - | - | - |
| Very long-chain specific acyl-CoA dehydrogenase, mitochondrial                                             | P50544 | Acadvl  | Mitochondrion inner membrane                                                                           | ↓ | ↓ | ↑ | ↓ | ↑ | ↓ | ↓ | ↓ | ↓ | ↓ | ↓ | ↓ | ↑ | ↓ | ↓ | ↓ | ↓ | ↓ |
| Long-chain specific acyl-CoA dehydrogenase, mitochondrial                                                  | P51174 | Acadl   | Mitochondrion matrix                                                                                   | ↓ | ↓ | ↑ | ↓ | ↑ | ↓ | ↓ | ↓ | ↓ | ↓ | ↓ | ↓ | ↓ | ↓ | ↓ | ↓ | ↓ | ↓ |
| ADP/ATP translocase 2;ADP/ATP translocase 2, N-terminally processed                                        | P51881 | Slc25a5 | Mitochondrion inner membrane->Multi-pass membrane protein                                              | - | ↑ | ↑ | ↑ | ↑ | - | ↑ | - | - | - | - | - | ↑ | - | - | - | - | ↑ |
| Lipoamide acyltransferase component of branched-chain alpha-keto acid dehydrogenase complex, mitochondrial | P53395 | Dbt     | Mitochondrion matrix                                                                                   | ↓ | ↓ | ↓ | ↓ | ↑ | ↓ | ↓ | ↓ | ↓ | ↓ | ↓ | ↓ | ↓ | ↓ | ↓ | ↓ | ↓ | ↓ |
| Isocitrate dehydrogenase [NADP], mitochondrial                                                             | P54071 | Idh2    | Mitochondrion                                                                                          | ↓ | ↓ | ↑ | ↓ | ↑ | ↓ | ↓ | ↓ | ↓ | ↓ | ↓ | ↓ | ↑ | ↓ | ↓ | ↓ | ↓ | ↓ |
| Cytochrome c oxidase copper chaperone                                                                      | P56394 | Cox17   | Mitochondrion intermembrane space; Cytoplasm                                                           | ↓ | ↓ | ↓ | ↓ | ↓ | ↓ | ↓ | ↓ | ↓ | ↓ | ↓ | ↓ | ↑ | ↓ | ↓ | ↓ | ↓ | ↓ |
| ATP synthase subunit beta, mitochondrial                                                                   | P56480 | Atp5b   | Mitochondrion inner membrane                                                                           | ↓ | ↓ | ↑ | ↓ | ↑ | ↓ | ↓ | ↓ | ↓ | ↓ | ↓ | ↓ | ↑ | ↓ | ↓ | ↓ | ↓ | ↓ |
| 28S ribosomal protein S21, mitochondrial                                                                   | P58059 | Mrps21  | Mitochondrion                                                                                          | ↓ | ↓ | ↓ | ↓ | ↓ | ↓ | ↓ | ↓ | ↓ | ↓ | ↓ | ↓ | ↓ | ↓ | ↓ | ↓ | ↓ | ↓ |
| Cytochrome c, somatic                                                                                      | P62897 | Cycs    | Mitochondrion intermembrane space                                                                      | ↓ | ↓ | ↑ | ↓ | ↑ | ↓ | ↓ | ↓ | ↓ | ↓ | ↓ | ↓ | ↑ | ↓ | ↓ | ↓ | ↓ | ↓ |
| 40S ribosomal protein S3                                                                                   | P62908 | Rps3    | Cytoplasm; Nucleus; Nucleus->nucleolus; Mitochondrion inner membrane; Cytoplasm->cytoskeleton->spindle | ↓ | ↓ | ↑ | ↓ | ↑ | ↓ | ↓ | ↓ | ↓ | ↓ | ↓ | ↓ | ↑ | ↓ | ↓ | ↓ | ↓ | ↓ |
| 60 kDa heat shock protein, mitochondrial                                                                   | P63038 | Hspd1   | Mitochondrion matrix                                                                                   | ↑ | ↑ | ↑ | ↓ | ↑ | ↓ | ↑ | ↓ | ↓ | ↓ | ↑ | ↓ | ↑ | ↓ | ↓ | ↓ | ↓ | ↓ |
| Isocitrate dehydrogenase [NAD] subunit gamma 1, mitochondrial                                              | P70404 | Idh3g   | Mitochondrion                                                                                          | ↓ | ↑ | ↑ | ↓ | ↑ | ↓ | ↓ | ↓ | ↓ | ↓ | ↓ | ↓ | ↑ | ↓ | ↓ | ↓ | ↓ | ↓ |



|                                                                                                                               |        |        |                                                                                                    |   |   |   |   |   |   |   |   |   |   |   |   |   |   |   |   |   |   |
|-------------------------------------------------------------------------------------------------------------------------------|--------|--------|----------------------------------------------------------------------------------------------------|---|---|---|---|---|---|---|---|---|---|---|---|---|---|---|---|---|---|
| Cytochrome c oxidase subunit NDUFA4                                                                                           | Q62425 | Ndufa4 | Mitochondrion inner membrane                                                                       | ↓ | ↓ | ↓ | ↓ | ↑ | ↓ | ↓ | ↓ | ↓ | ↓ | ↓ | ↓ | ↑ | ↓ | ↓ | ↓ | ↓ | ↓ |
| Synaptic vesicle membrane protein VAT-1 homolog                                                                               | Q62465 | Vat1   | Cytoplasm; Mitochondrion outer membrane<br>Peripheral membrane protein                             | ↓ | ↓ | ↓ | ↓ | ↓ | ↓ | ↓ | ↓ | ↓ | ↓ | ↓ | ↓ | ↓ | ↓ | ↓ | ↓ | ↓ | ↓ |
| 10 kDa heat shock protein, mitochondrial                                                                                      | Q64433 | Hspe1  | Mitochondrion matrix                                                                               | ↓ | ↓ | ↑ | ↓ | ↑ | ↓ | ↓ | ↓ | ↓ | ↓ | ↓ | ↓ | ↑ | ↓ | ↓ | ↓ | ↓ | ↓ |
| Leucine-rich PPR motif-containing protein, mitochondrial                                                                      | Q6PB66 | Lrpprc | Mitochondrion; Nucleus; Nucleus->nucleoplasm;<br>Nucleus inner membrane;<br>Nucleus outer membrane | ↓ | ↓ | ↑ | ↓ | ↑ | ↓ | ↓ | ↓ | ↓ | ↓ | ↓ | ↓ | ↑ | ↓ | ↓ | ↓ | ↓ | ↓ |
| 28S ribosomal protein S7, mitochondrial                                                                                       | Q80X85 | Mrps7  | Mitochondrion                                                                                      | ↓ | ↓ | ↓ | ↓ | ↑ | ↓ | ↓ | ↓ | ↓ | ↓ | ↓ | ↓ | ↑ | ↓ | ↓ | ↓ | ↓ | ↓ |
| 28S ribosomal protein S10, mitochondrial                                                                                      | Q80ZK0 | Mrps10 | Mitochondrion                                                                                      | - | - | ↑ | - | ↑ | - | ↑ | - | - | - | ↑ | - | ↑ | - | - | - | - | - |
| 28S ribosomal protein S26, mitochondrial                                                                                      | Q80ZS3 | Mrps26 | Mitochondrion                                                                                      | ↓ | ↓ | ↑ | ↓ | ↑ | ↓ | ↓ | ↓ | ↓ | ↓ | ↓ | ↓ | ↑ | ↓ | ↓ | ↓ | ↓ | ↓ |
| Elongation factor Tu, mitochondrial                                                                                           | Q8BFR5 | Tufm   | Mitochondrion                                                                                      | ↓ | ↓ | ↑ | ↑ | ↑ | ↓ | ↓ | ↓ | ↓ | ↓ | ↓ | ↓ | ↑ | ↓ | ↓ | ↓ | ↓ | ↓ |
| Ubiquinone biosynthesis protein COQ4 homolog, mitochondrial<br>[ECO:0000255]   HAMAP-Rule:MF_031111                           | Q8BGB8 | Coq4   | Mitochondrion inner membrane                                                                       | - | - | - | ↑ | ↑ | - | - | - | - | - | - | - | - | - | - | - | - | - |
| Phosphoenolpyruvate carboxykinase [GTP], mitochondrial                                                                        | Q8BH04 | Pck2   | Mitochondrion                                                                                      | ↓ | ↑ | ↑ | ↑ | ↑ | ↓ | ↓ | ↓ | ↓ | ↓ | ↓ | ↓ | ↑ | ↓ | ↓ | ↓ | ↓ | ↓ |
| Enoyl-CoA hydratase, mitochondrial                                                                                            | Q8BH95 | Echs1  | Mitochondrion matrix                                                                               | ↓ | ↓ | ↑ | ↑ | ↑ | ↓ | ↓ | ↓ | ↓ | ↓ | ↓ | ↓ | ↑ | ↓ | ↓ | ↓ | ↓ | ↓ |
| Isoleucine--tRNA ligase, mitochondrial                                                                                        | Q8BIJ6 | Iars2  | Mitochondrion matrix                                                                               | - | - | ↑ | ↑ | ↑ | - | - | - | - | - | - | - | ↑ | - | - | - | - | - |
| Aspartate--tRNA ligase, mitochondrial                                                                                         | Q8BIP0 | Dars2  | Mitochondrion matrix                                                                               | ↓ | ↓ | ↓ | ↑ | ↑ | ↓ | ↓ | ↓ | ↓ | ↓ | ↓ | ↓ | ↑ | ↓ | ↓ | ↓ | ↓ | ↓ |
| 28S ribosomal protein S35, mitochondrial                                                                                      | Q8BJZ4 | Mrps35 | Mitochondrion                                                                                      | ↓ | ↓ | ↓ | ↓ | ↓ | ↓ | ↓ | ↓ | ↓ | ↓ | ↓ | ↓ | ↓ | ↓ | ↓ | ↓ | ↓ | ↓ |
| 28S ribosomal protein S27, mitochondrial<br>[ECO:0000305]                                                                     | Q8BK72 | Mrps27 | Cytoplasm; Mitochondrion                                                                           | - | - | - | - | ↑ | - | - | - | - | - | - | - | ↑ | - | - | - | - | - |
| Pyruvate dehydrogenase protein X component, mitochondrial                                                                     | Q8BKZ9 | Pdhx   | Mitochondrion matrix                                                                               | ↓ | ↓ | ↑ | ↓ | ↑ | ↓ | ↓ | ↓ | ↓ | ↓ | ↓ | ↓ | ↓ | ↓ | ↓ | ↓ | ↓ | ↓ |
| Trifunctional enzyme subunit alpha, mitochondrial; Long-chain enoyl-CoA hydratase; Long chain 3-hydroxyacyl-CoA dehydrogenase | Q8BMS1 | Hadha  | Mitochondrion matrix                                                                               | ↓ | ↓ | ↑ | ↓ | ↑ | ↓ | ↓ | ↓ | ↓ | ↓ | ↓ | ↓ | ↑ | ↓ | ↓ | ↓ | ↓ | ↓ |
| 39S ribosomal protein L22, mitochondrial                                                                                      | Q8BU88 | Mrpl22 | Mitochondrion                                                                                      | ↓ | ↓ | ↓ | ↑ | ↑ | ↓ | ↓ | ↓ | ↓ | ↓ | ↓ | ↓ | ↓ | ↓ | ↓ | ↓ | ↓ | ↓ |
| 3-ketoacyl-CoA thiolase, mitochondrial                                                                                        | Q8BWT1 | Acaa2  | Mitochondrion                                                                                      | ↓ | ↓ | ↓ | ↓ | ↑ | ↓ | ↓ | ↓ | ↓ | ↓ | ↓ | ↓ | ↑ | ↓ | ↓ | ↓ | ↓ | ↓ |
| G-rich sequence factor 1                                                                                                      | Q8C5Q4 | Grsf1  | Cytoplasm; Mitochondrion matrix->mitochondrion nucleoid                                            | - | - | - | - | ↑ | - | - | - | - | - | - | - | ↑ | - | - | - | - | - |
| Lon protease homolog, mitochondrial<br>[ECO:0000255]   HAMAP-Rule:MF_03120                                                    | Q8CGK3 | Lonp1  | Mitochondrion matrix                                                                               | ↓ | ↓ | ↓ | ↓ | ↑ | ↓ | ↓ | ↓ | ↓ | ↓ | ↓ | ↓ | ↓ | ↓ | ↓ | ↓ | ↓ | ↓ |
| Acyl-CoA dehydrogenase family member 9, mitochondrial                                                                         | Q8JZN5 | Acad9  | Mitochondrion                                                                                      | ↓ | ↓ | ↑ | ↑ | ↑ | ↓ | ↓ | ↓ | ↓ | ↓ | ↓ | ↓ | ↑ | ↓ | ↓ | ↓ | ↓ | ↓ |
| Elongation factor G, mitochondrial<br>[ECO:0000255]   HAMAP-Rule:MF_03061                                                     | Q8K0D5 | Gfm1   | Mitochondrion                                                                                      | ↓ | ↑ | ↑ | ↓ | ↑ | ↓ | ↓ | ↓ | ↓ | ↓ | ↓ | ↓ | ↑ | ↓ | ↓ | ↓ | ↓ | ↓ |
| CCA tRNA nucleotidyltransferase 1, mitochondrial                                                                              | Q8K1J6 | Trnt1  | Mitochondrion                                                                                      | - | - | - | - | ↑ | - | - | - | - | - | - | - | - | - | - | - | - | - |
| Polyribonucleotide nucleotidyltransferase 1, mitochondrial                                                                    | Q8K1R3 | Pnpt1  | Cytoplasm; Mitochondrion; Mitochondrion intermembrane space                                        | - | ↑ | ↑ | ↑ | ↑ | - | - | - | - | - | - | - | - | - | - | - | - | - |
| Ubiquinone biosynthesis protein COQ9, mitochondrial                                                                           | Q8K1Z0 | Coq9   | Mitochondrion                                                                                      | ↓ | ↓ | ↓ | ↓ | ↓ | ↓ | ↑ | ↓ | ↓ | ↓ | ↓ | ↑ | ↓ | ↑ | ↓ | ↓ | ↓ | ↓ |
| Succinate dehydrogenase [ubiquinone] flavoprotein subunit, mitochondrial                                                      | Q8K2B3 | Sdha   | Mitochondrion inner membrane                                                                       | ↓ | ↓ | ↑ | ↓ | ↑ | ↓ | ↓ | ↓ | ↓ | ↓ | ↓ | ↓ | ↑ | ↓ | ↓ | ↓ | ↓ | ↓ |









|                                                                            |                |              |                                                                                                                                                                                                                |   |   |   |   |   |   |   |   |   |   |   |   |   |   |   |   |   |   |
|----------------------------------------------------------------------------|----------------|--------------|----------------------------------------------------------------------------------------------------------------------------------------------------------------------------------------------------------------|---|---|---|---|---|---|---|---|---|---|---|---|---|---|---|---|---|---|
| Oligoribonuclease, mitochondrial                                           | Q9D8S4         | Rexo2        | Mitochondrion intermembrane space;<br>Mitochondrion matrix                                                                                                                                                     | ↓ | ↓ | ↑ | ↓ | ↑ | ↓ | ↓ | ↓ | ↓ | ↓ | ↓ | ↓ | ↑ | ↓ | ↑ | ↓ | ↓ | ↑ |
| Glycine amidinotransferase, mitochondrial                                  | Q9D964         | Gatm         | Mitochondrion inner membrane                                                                                                                                                                                   | ↓ | ↓ | ↑ | ↓ | ↑ | ↓ | ↓ | ↓ | ↓ | ↓ | ↓ | ↓ | ↑ | ↓ | ↓ | ↓ | ↓ | ↓ |
| 39S ribosomal protein L12, mitochondrial                                   | Q9DB15         | Mrpl12       | Mitochondrion                                                                                                                                                                                                  | ↓ | ↓ | ↑ | ↓ | ↑ | ↓ | ↑ | ↓ | ↓ | ↓ | ↓ | ↓ | ↓ | ↓ | ↓ | ↓ | ↓ | ↑ |
| ATP synthase subunit O, mitochondrial                                      | Q9DB20         | Atp5o        | Mitochondrion; Mitochondrion inner membrane                                                                                                                                                                    | ↓ | ↓ | ↑ | ↑ | ↑ | ↓ | ↓ | ↓ | ↓ | ↓ | ↓ | ↓ | ↑ | ↓ | ↓ | ↓ | ↓ | ↓ |
| Cytochrome b-c1 complex subunit 2, mitochondrial                           | Q9DB77         | Uqcrc2       | Mitochondrion inner membrane                                                                                                                                                                                   | ↓ | ↓ | ↓ | ↓ | ↑ | ↓ | ↓ | ↓ | ↓ | ↓ | ↓ | ↓ | ↓ | ↓ | ↓ | ↓ | ↓ | ↓ |
| Short/branched chain specific acyl-CoA dehydrogenase, mitochondrial        | Q9DBL1         | Acadsb       | Mitochondrion matrix                                                                                                                                                                                           | ↓ | ↓ | ↓ | ↓ | ↑ | ↓ | ↓ | ↓ | ↓ | ↓ | ↓ | ↓ | ↓ | ↓ | ↓ | ↓ | ↓ | ↓ |
| ATP-binding cassette sub-family B member 6, mitochondrial                  | Q9DC29         | Abcb6        | Cell membrane; Mitochondrion outer membrane;<br>Endoplasmic reticulum membrane;<br>Golgi apparatus membrane; Endosome membrane                                                                                 | - | - | - | - | - | - | - | - | - | - | - | ↑ | - | - | - | - | - | - |
| Mitochondrial-processing peptidase subunit alpha                           | Q9DC61         | Pmpca        | Mitochondrion matrix; Mitochondrion inner membrane                                                                                                                                                             | ↓ | ↓ | ↓ | ↓ | ↑ | ↓ | ↓ | ↓ | ↓ | ↓ | ↓ | ↓ | ↓ | ↓ | ↓ | ↓ | ↓ | ↓ |
| 28S ribosomal protein S15, mitochondrial                                   | Q9DC71         | Mrps15       | Mitochondrion                                                                                                                                                                                                  | ↓ | ↓ | ↑ | ↓ | ↑ | ↓ | ↓ | ↓ | ↓ | ↓ | ↓ | ↓ | ↓ | ↓ | ↓ | ↓ | ↓ | ↓ |
| 28S ribosomal protein S11, mitochondrial                                   | Q9DCA2         | Mrps11       | Mitochondrion                                                                                                                                                                                                  | - | - | - | ↑ | - | - | - | - | - | - | - | - | - | - | - | - | - | - |
| Persulfide dioxygenase ETHE1, mitochondrial                                | Q9DCM0         | Ethe1        | Cytoplasm; Nucleus; Mitochondrion matrix                                                                                                                                                                       | - | ↑ | ↑ | ↑ | ↑ | - | ↑ | - | - | - | - | - | ↑ | - | - | - | - | - |
| Enoyl-[acyl-carrier-protein] reductase, mitochondrial                      | Q9DCS3         | Mecr         | Mitochondrion                                                                                                                                                                                                  | - | - | - | - | - | ↑ | - | - | - | - | - | - | - | - | - | - | - | - |
| NADH dehydrogenase [ubiquinone] iron-sulfur protein 3, mitochondrial       | Q9DCT2         | Ndufs3       | Mitochondrion inner membrane                                                                                                                                                                                   | - | - | - | - | - | - | - | - | - | - | - | ↑ | - | - | - | - | - | - |
| 39S ribosomal protein L4, mitochondrial                                    | Q9DCU6         | Mrpl4        | Mitochondrion                                                                                                                                                                                                  | - | ↑ | ↑ | ↑ | ↑ | - | - | - | - | - | - | - | - | - | - | - | - | - |
| Electron transfer flavoprotein subunit beta {ECO:0000305}                  | Q9DCW4         | Etfb         | Mitochondrion matrix                                                                                                                                                                                           | ↓ | ↓ | ↑ | ↓ | ↑ | ↓ | ↓ | ↓ | ↓ | ↓ | ↓ | ↓ | ↑ | ↓ | ↓ | ↓ | ↓ | ↓ |
| ATP synthase subunit d, mitochondrial                                      | Q9DCX2         | Atp5h        | Mitochondrion; Mitochondrion inner membrane                                                                                                                                                                    | - | - | - | - | ↑ | - | - | - | - | - | - | - | - | - | - | - | - | - |
| 39S ribosomal protein L46, mitochondrial                                   | Q9EQI8         | Mrpl46       | Mitochondrion                                                                                                                                                                                                  | - | - | ↑ | ↑ | ↑ | ↑ | - | - | - | - | - | - | ↑ | - | - | - | - | - |
| 28S ribosomal protein S29, mitochondrial                                   | Q9ER88         | Dap3         | Mitochondrion                                                                                                                                                                                                  | - | - | - | ↑ | ↑ | - | - | - | - | - | - | - | ↑ | - | - | - | - | - |
| Isovaleryl-CoA dehydrogenase, mitochondrial                                | Q9JH15         | Ivd          | Mitochondrion matrix                                                                                                                                                                                           | ↓ | ↓ | ↑ | ↓ | ↑ | ↓ | ↓ | ↓ | ↓ | ↓ | ↓ | ↓ | ↑ | ↓ | ↓ | ↓ | ↓ | ↓ |
| ATP-dependent Clp protease ATP-binding subunit clpX-like, mitochondrial    | Q9JHS4         | Clpx         | Mitochondrion; Mitochondrion matrix->mitochondrion nucleoid                                                                                                                                                    | ↓ | ↓ | ↑ | ↓ | ↑ | ↓ | ↓ | ↓ | ↓ | ↓ | ↓ | ↓ | ↑ | ↓ | ↓ | ↓ | ↓ | ↓ |
| 28S ribosomal protein S34, mitochondrial                                   | Q9JIK9         | Mrps34       | Mitochondrion                                                                                                                                                                                                  | ↓ | ↓ | ↑ | ↓ | ↑ | ↓ | ↓ | ↓ | ↓ | ↓ | ↓ | ↓ | ↓ | ↓ | ↓ | ↓ | ↓ | ↓ |
| Serine--tRNA ligase, mitochondrial                                         | Q9JL8          | Sars2        | Mitochondrion matrix                                                                                                                                                                                           | - | - | - | - | ↑ | - | - | - | - | - | - | - | - | - | - | - | - | - |
| 39S ribosomal protein L39, mitochondrial                                   | Q9JKF7         | Mrpl39       | Mitochondrion                                                                                                                                                                                                  | ↓ | ↓ | ↓ | ↓ | ↑ | ↓ | ↓ | ↓ | ↓ | ↓ | ↓ | ↓ | ↑ | ↓ | ↓ | ↓ | ↓ | ↓ |
| Long-chain-fatty-acid--CoA ligase 4                                        | Q9QUJ7         | Acs14        | Mitochondrion outer membrane; Peroxisome membrane; Microsome membrane; Endoplasmic reticulum membrane                                                                                                          | ↓ | ↓ | ↓ | ↓ | ↓ | ↓ | ↓ | ↓ | ↓ | ↓ | ↓ | ↓ | ↑ | ↓ | ↓ | ↓ | ↓ | ↑ |
| Long-chain-fatty-acid--CoA ligase 4    Long-chain-fatty-acid--CoA ligase 3 | Q9QUJ7; Q9CZW4 | Acs14; Acs13 | Mitochondrion outer membrane; Peroxisome membrane; Microsome membrane; Endoplasmic reticulum membrane    Mitochondrion outer membrane; Peroxisome membrane; Microsome membrane; Endoplasmic reticulum membrane | - | ↑ | ↑ | ↑ | ↑ | - | ↑ | - | - | - | - | - | ↑ | - | - | - | - | - |
| Chloride intracellular channel protein 4                                   | Q9QYB1         | Clic4        | Cytoplasm; Cytoplasmic vesicle membrane; Nucleus; Cell membrane; Mitochondrion                                                                                                                                 | ↓ | ↓ | ↑ | ↓ | ↑ | ↓ | ↓ | ↓ | ↓ | ↓ | ↓ | ↑ | ↓ | ↑ | ↓ | ↓ | ↓ | ↓ |
